# Supplementary material
Source: PubMed Central journal article supplement (PMC2647673)
Supplement: blood-2007-12-130260_1.pdf [file blood-2007-12-130260_1.pdf]

| Location | Position    | SNP ID     | Sequence                                                                     |
|----------|-------------|------------|------------------------------------------------------------------------------|
| 11p15.4  | 5,517,831   | rs10500648 | 5'-ATT CCC CTA CGG ATG GAG TC-3'<br>5'-TCC GTC CCA TTC TTA GAC CA-3'         |
| 11p15.3  | 11,738,991  | rs7937815  | 5'-TGG GCT GAG TTT TCT TCT CC-3'<br>5'-CGG GGA CTC ACA GAC CAG T-3'          |
| 10q26.3  | 130,674,064 | rs10491032 | 5'-TGC ACG TGG ACA CTT CAA CT-3'<br>5'-CTG CAG AGA GGT ACA GGG TGT-3'        |
| 10q26.11 | 119,007,771 | rs363221   | 5'-CCA GCC CAT CTC CTG TGA TA-3'<br>5'-AAG AGG CGT GGG AAA AAG AC-3'         |
| 10q25.1  | 109,365,709 | rs2099803  | 5'-TCA GCC ATA CTC CAG ATT TGC-3'<br>5'-TCA TGT AGA CTG AAG GCC AGA-3'       |
| 10q23.33 | 96,419,711  | rs2104543  | 5'-CGG TCA TCC ATT CCT CTT GT-3'<br>5'-TCC AGT GGA TCA CCA TTC AG-3'         |
| 10q23.32 | 92,966,343  | rs7075893  | 5'-GCA AGG GAA GTC CTT GAA AA-3'<br>5'-TTA TGT ACC TAA GAA TGC TGT TTA AT-3' |
| 10q23.31 | 91,575,008  | rs7918018  | 5'-ACC ACT TCC TCT GGT GGA CA-3'<br>5'-AAG GAA ATT CAG CAG GAT GC-3'         |
