# Supplementary material
Source: PubMed Central journal article supplement (PMC2647673)
Supplement: blood-2007-12-130260_2.pdf [file blood-2007-12-130260_2.pdf]

| Gene                | Sequence                                                                     | Melting temperature (°C) |
|---------------------|------------------------------------------------------------------------------|--------------------------|
| <i>MYC</i>          | 5'-CAG ATC AGC AAC AAC CGA AA-3'<br>5'-GGC CTT TTC ATT GTT TTC CA-3'         | 84.0                     |
| 11p15.4             | 5'-ATC CAG GAA GGA CTG TGT GG-3'<br>5'-TAG CAG CAG AGG CAG GAT TT-3'         | 82.5                     |
| 10q24.31            | 5'-CCC AAT GGA GAT TCC CAG AG-3'<br>5'-TGA TTT GAT GTG CTC TGA TGC-3'        | 87.0                     |
| 2p21<br>(control)   | 5'-GGC AAT CCT GGC TGC GGA TCA AGA-3'<br>5'-ATT TCT GAA CTT CTT GGC TGC C-3' | 81.0                     |
| <i>ERG</i>          | 5'- CAG AGG GTT CAA CCA GGT GT-3'<br>5'- AGG GTG TTG CTC CCC TAA GT-3'       | 87.0                     |
| $\beta$ -actin mRNA | 5'-CCC AGA TCA TGT TTG AGA CC-3'<br>5'-AGG GCA TAC CCC TCG TAG AT-3'         | 87.0                     |
| c-Myc mRNA          | 5'-ACGTCTCCACACATCAGCAC-3'<br>5'-CGC CTC TTG ACA TTC TCC TC-3'               | 88.0                     |
